# Supplementary material
Source: HighWire-hosted journal article supplement (https://molpharm.aspetjournals.org/content/suppl/2021/12/14/molpharm.121.000354)
Supplement: 354_supp_material_with_captions.pdf [file 354_supp_material_with_captions.pdf]

**Supplementary Data:**

**Senolytic-mediated elimination of head and neck tumor cells**

**induced into senescence by cisplatin**

**Fereshteh Ahmadinejad<sup>1\*</sup>, Tasia Bos<sup>2\*</sup>, Bin Hu<sup>3</sup>, Erin Britt<sup>2</sup>, Jennifer Koblinski<sup>3</sup>, Andrew J. Souers<sup>4</sup>, Joel D. Levenson<sup>4</sup>, Anthony C. Faber<sup>2</sup>, David A. Gewirtz<sup>5#</sup>, Hisashi Harada<sup>2#</sup>**

1: Department of Human and Molecular Genetics, School of Medicine, Massey Cancer Center, Virginia Commonwealth University, Richmond, Virginia

2: Philips Institute for Oral Health Research, School of Dentistry, Massey Cancer Center, Virginia Commonwealth University, Richmond, Virginia

3: Cancer Mouse Models Core, Massey Cancer Center, Virginia Commonwealth University, Richmond, Virginia

4: AbbVie, North Chicago, Illinois

5: Department of Pharmacology and Toxicology, School of Medicine, Massey Cancer Center, Virginia Commonwealth University, Richmond, Virginia

**Figure S1**

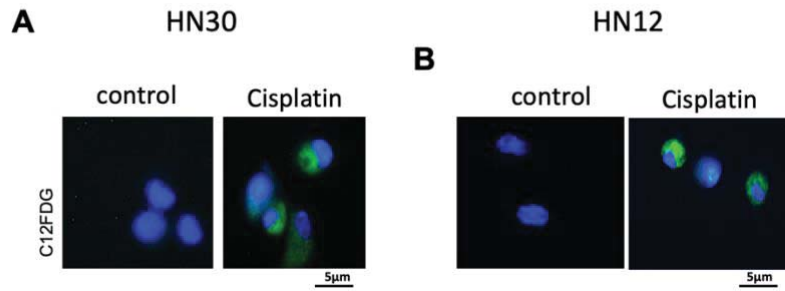

**Figure S1. Immunofluorescence imaging of C<sub>12</sub>FDG in A) HN30 and B) HN12 cells after senescence induction by 5 μM cisplatin. Blue fluorescence indicates nuclear staining with DAPI, and green fluorescence reflects C<sub>12</sub>FDG immunostaining.**

**Figure S2**

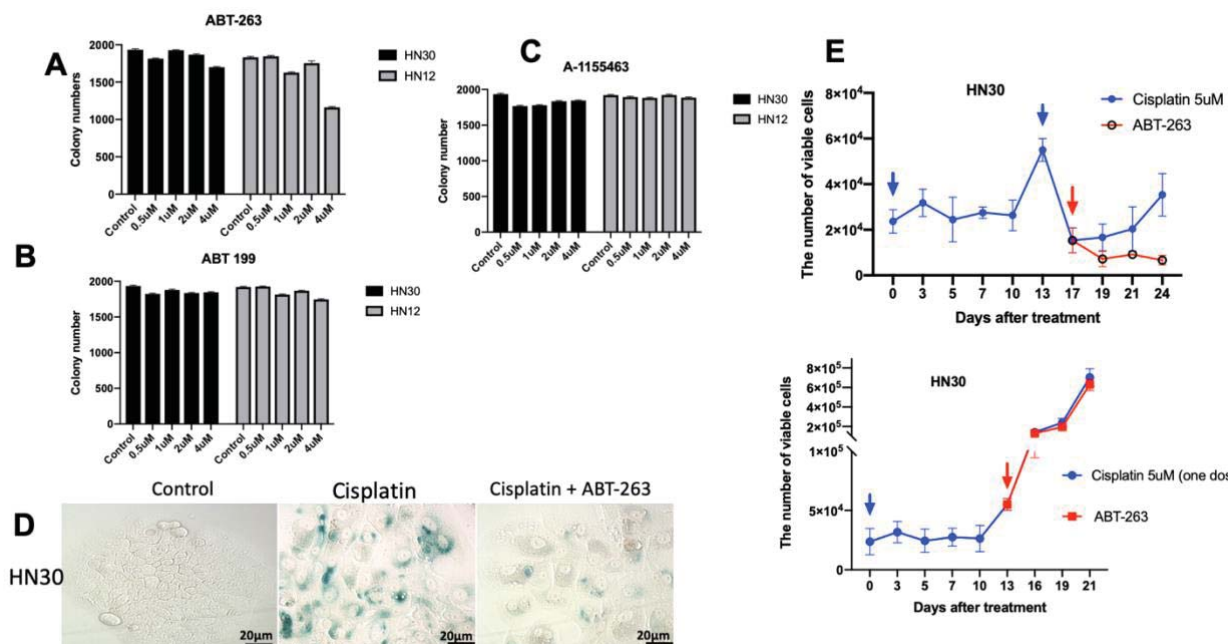

**Figure S2. ABT-263 has minimal cytotoxicity on non-senescent cells or proliferative recovering cells from senescence.** **A, B, and C)** Clonogenic survival assay performed on control cells treated with different concentrations of ABT-263 for 24 hours. The number of colonies were counted and analyzed. **D)** X-gal staining after sequential treatment of HN30 cells with cisplatin and ABT-263; decreased population of SA-β-gal positive cells show that ABT-263 treatment eliminates senescent cells. **E)** ABT-263 effectiveness diminishes over time when HN30 cells recover their proliferative capacity. Blue arrows indicate the cisplatin treatment timepoint. Red arrows are ABT-263 treatment timepoints. Note that HN30 cells undergo cell death only when they are in senescence state (top), but not in recovery stage (bottom). All quantitative graphs are mean ± SD from at least three independent experiments.

**Figure S3**

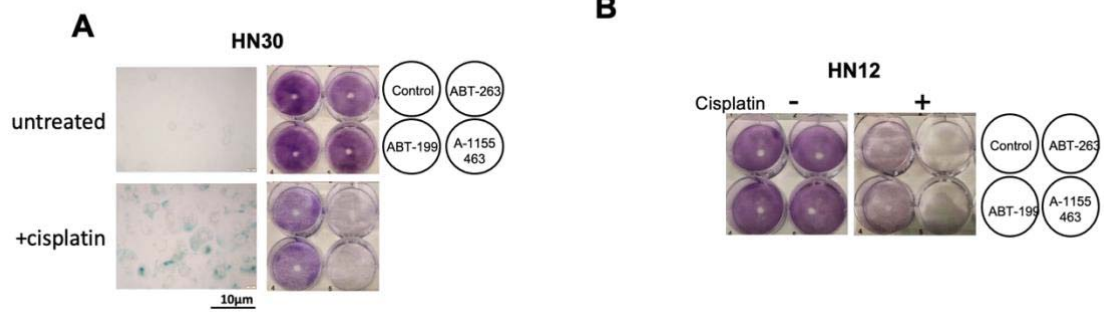

**Figure S3. BCL-X<sub>L</sub> is the primary target for ABT-263-induced senolysis.** Clonogenic survival assay performed on **A) HN30 and B) HN12** cells treated with vehicle or cisplatin followed by ABT-263, ABT-199, and A-1155463 (1µM for 24 hours).

**Figure S4**

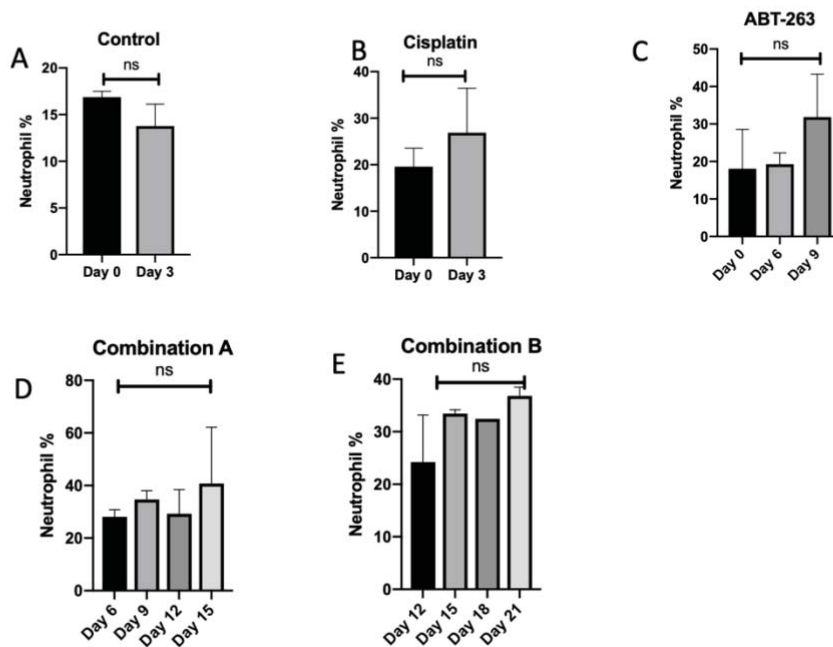

**Figure S4.** Cisplatin, ABT-263 treatment alone or in combination did not result in significant Neutropenia. Blood samples were analyzed for neutrophil percentage at different time points in different groups of **A)** control, **B)** Cisplatin alone, **C)** ABT-263, **D)** and **E)** cisplatin in combination with ABT-263. Control vs ABT, cisplatin, Combination A or B:  $p > 0.05$  All quantitative graphs are mean  $\pm$  SD from at least three independent experiments. \*  $p \leq 0.05$ , \*\*  $p \leq 0.01$ , \*\*\*  $p \leq 0.001$ , \*\*\*\*  $p \leq 0.0001$  0001 indicate statistical significance of each condition compared to indicated condition as determined using two - way ANOVA with Sidak's post hoc test.

**Figure S5**

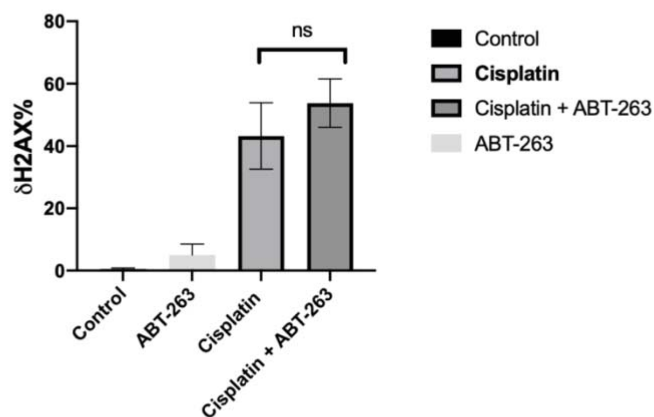

**Figure S5.** Cisplatin, ABT-263 treatment alone or in combination did not result in significant levels of DNA double strand breaks measured by  $\gamma$ -H2AX levels.  $p > 0.05$  All quantitative graphs are mean  $\pm$  SD from at least three independent experiments. \*  $p \leq 0.05$ , \*\*  $p \leq 0.01$ , \*\*\*  $p \leq 0.001$ , \*\*\*\*  $p \leq 0.0001$  0001 indicate statistical significance of each condition compared to indicated condition as determined using two - way ANOVA with Sidak's post hoc test.

Figure S6

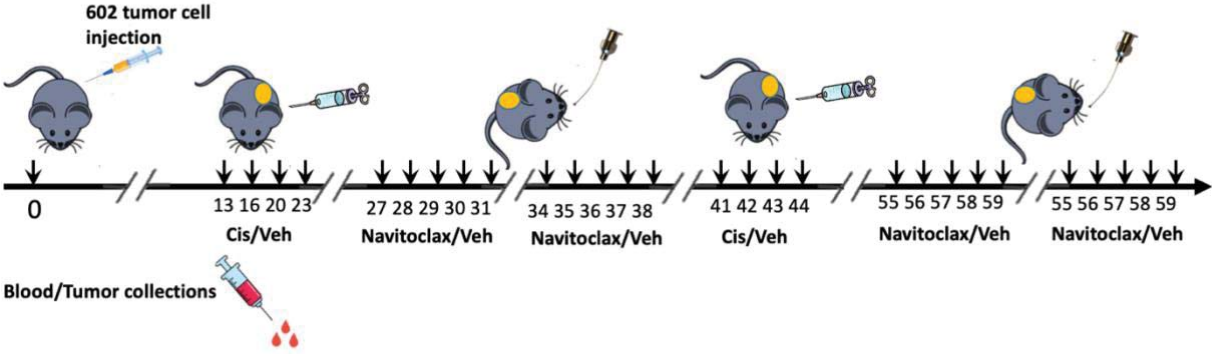

Figure S6. Animal experiments diagram.
